# Supplementary material
Source: MDPI journal article supplement (https://www.mdpi.com/2076-3417/11/19/9241)
Supplement: s1 [file s1]

**Table S1.** Pearson correlation coefficients for parameters studied.

| Parameters    | AOA    | TPC    | FL     | Gallic acid | dHB    | Vanillic acid | Syringic acid | Caffeic acid | Coumaric acid | Ferulic acid | Rutin  | Quercetin |
|---------------|--------|--------|--------|-------------|--------|---------------|---------------|--------------|---------------|--------------|--------|-----------|
| AOA           | 1.000  |        |        |             |        |               |               |              |               |              |        |           |
| TPC           | 0,957* | 1.000  |        |             |        |               |               |              |               |              |        |           |
| FL            | 0,939* | 0,969* | 1.000  |             |        |               |               |              |               |              |        |           |
| Gallic acid   | 0,757* | 0,810* | 0,788* | 1.000       |        |               |               |              |               |              |        |           |
| dHB           | 0,243  | 0,295  | 0,294  | 0,640*      | 1.000  |               |               |              |               |              |        |           |
| Vanillic acid | 0,799* | 0,763* | 0,803  | 0,778*      | 0,476  | 1.000         |               |              |               |              |        |           |
| Syringic acid | -0,196 | -0,109 | -0,080 | -0,386      | -0,317 | -0,359        | 1.000         |              |               |              |        |           |
| Caffeic acid  | 0,756* | 0,787* | 0,811* | 0,896*      | 0,568* | 0,745*        | -0,268        | 1.000        |               |              |        |           |
| Coumaric acid | -0,022 | 0,141  | 0,162  | -0,108      | -0,138 | -0,308        | 0,723*        | 0,019        | 1.000         |              |        |           |
| Ferulic acid  | 0,414* | 0,549* | 0,593* | 0,428*      | 0,227  | 0,223         | 0,398         | 0,543*       | 0,755*        | 1.000        |        |           |
| Rutin         | 0,819* | 0,858* | 0,915* | 0,637*      | 0,142  | 0,720*        | 0,066         | 0,734        | 0,239         | 0,605*       | 1.000  |           |
| Quercetin     | 0,788* | 0,831* | 0,841* | 0,948*      | 0,557* | 0,746*        | -0,336        | 0,929*       | 0,045         | 0,576*       | 0,714* | 1.000     |

AOA: antioxidant activity; TPC: total phenolic content; FL: total flavonoid content; dHB: protocatechuic acid. \* denotes a statistically significant difference at p 0,05 level.
